# Supplementary material
Source: MDPI journal article supplement (https://www.mdpi.com/search?q=nutrients-11-01980)
Supplement: s001 [file nutrients-11-01980-s001.pdf]

**Supplementary Table 1.** Relative change in mean neonatal levels of cytokines, adipokines and other proteins involved in the immune response with 95% confidence linked with every doubling in neonatal whole blood zinc content — results from models with correction for multiple testing.

| <b>Outcome</b> | <b>Variable</b> | <b>Univariate Model</b> | <b><i>p</i>-Value</b> | <b>Multivariate Model</b> | <b><i>p</i>-Value</b> |
|----------------|-----------------|-------------------------|-----------------------|---------------------------|-----------------------|
| IL-1 $\beta$   | WB-Zinc content | 1.00 (0.85; 1.18)       | 1.00                  | 0.97 (0.82; 1.15)         | 1.00                  |
| IL-4           | WB-Zinc content | 0.99 (0.89; 1.09)       | 1.00                  | 0.97 (0.87; 1.08)         | 1.00                  |
| IL-6           | WB-Zinc content | 1.08 (0.94; 1.25)       | 0.69                  | 1.07 (0.92; 1.25)         | 0.93                  |
| IL-8           | WB-Zinc content | 0.98 (0.90; 1.07)       | 1.00                  | 1.02 (0.94; 1.10)         | 1.00                  |
| IL-10          | WB-Zinc content | 0.98 (0.76; 1.26)       | 1.00                  | 1.01 (0.79; 1.29)         | 1.00                  |
| IL-12          | WB-Zinc content | 1.08 (0.94; 1.25)       | 0.76                  | 1.03 (0.89; 1.17)         | 1.00                  |
| IFN- $\gamma$  | WB-Zinc content | 1.02 (0.89; 1.16)       | 1.00                  | 1.02 (0.88; 1.17)         | 1.00                  |
| TNF- $\alpha$  | WB-Zinc content | 1.07 (0.94; 1.21)       | 0.86                  | 1.01 (0.89; 1.14)         | 1.00                  |
| TGF- $\beta$   | WB-Zinc content | 1.05 (0.94; 1.18)       | 0.92                  | 1.01 (0.90; 1.13)         | 1.00                  |
| Adiponectin    | WB-Zinc content | 1.02 (0.93; 1.13)       | 1.00                  | 0.99 (0.91; 1.09)         | 1.00                  |
| Leptin         | WB-Zinc content | 0.97 (0.87; 1.08)       | 1.00                  | 1.00 (0.90; 1.10)         | 1.00                  |
| CRP            | WB-Zinc content | 0.91 (0.78; 1.06)       | 0.62                  | 0.97 (0.82; 1.14)         | 1.00                  |
| MBL            | WB-Zinc content | 1.05 (0.89; 1.23)       | 1.00                  | 1.05 (0.88; 1.25)         | 1.00                  |
| sTREM-1        | WB-Zinc content | 0.99 (0.84; 1.17)       | 1.00                  | 0.95 (0.81; 1.11)         | 0.99                  |

Covariates included in the multivariate models are neonatal whole blood Zinc (WB-Zinc) content, case-status (cases are children that develops childhood type 1 diabetes (T1D), and controls do not develop T1D during childhood), birthweight and period. IL, interleukin; IFN- $\gamma$ , interferon gamma; TNF- $\alpha$ , tumor necrosis factor alpha; TGF- $\beta$ , transforming growth factor beta; CRP, c-reactive protein; MBL, mannose-binding lectin; sTREM-1, soluble triggering receptor expressed on myeloid cells-1.
